# Supplementary material for: Rates of Cervical Cancer Screening Among Women With Severe Mental Illness in the Public Health System
Source: Atypon-hosted journal article supplement (doi:10.1176/appi.ps.201600293), 2017-04-17
Supplement: appi.ps.201600293.ds001.pdf [file appi.ps.201600293.ds001.pdf]

**Supplemental eTable 1:** Demographic and clinical characteristics of Medi-Cal recipients with severe mental illness by cervical cancer screening

| Characteristic                            | Total<br>(N=31308) |    | Screening<br>(N=6332) <sup>a</sup> |      | No screening<br>(N=24976) |      | P               |
|-------------------------------------------|--------------------|----|------------------------------------|------|---------------------------|------|-----------------|
|                                           | N                  | %  | N                                  | %    | N                         | %    |                 |
| <b>Age<sup>b</sup></b>                    |                    |    |                                    |      |                           |      | <b>&lt;.001</b> |
| 18-27 years                               | 3446               | 11 | 598                                | 17.4 | 2848                      | 82.6 |                 |
| 28-37 years                               | 4942               | 16 | 1126                               | 22.8 | 3816                      | 77.2 |                 |
| 38-47 years                               | 8269               | 26 | 1895                               | 22.9 | 6374                      | 77.1 |                 |
| 48-57 years                               | 10183              | 33 | 2009                               | 19.7 | 8174                      | 80.3 |                 |
| 58-67 years                               | 4468               | 14 | 704                                | 15.8 | 3764                      | 84.2 |                 |
| <b>Race/ethnicity</b>                     |                    |    |                                    |      |                           |      | <b>&lt;.001</b> |
| Asian/pacific islander                    | 4192               | 13 | 943                                | 22.5 | 3249                      | 77.5 |                 |
| Black                                     | 6059               | 19 | 1265                               | 20.9 | 4794                      | 79.1 |                 |
| Hispanic                                  | 6038               | 19 | 1272                               | 21.1 | 4766                      | 78.9 |                 |
| Other                                     | 3210               | 10 | 610                                | 19   | 2600                      | 81   |                 |
| White                                     | 11809              | 38 | 2242                               | 19   | 9567                      | 81   |                 |
| <b>County type</b>                        |                    |    |                                    |      |                           |      | .119            |
| Rural                                     | 954                | 3  | 213                                | 22.3 | 741                       | 77.7 |                 |
| Urban                                     | 30354              | 97 | 6119                               | 20.2 | 24235                     | 79.8 |                 |
| <b>Diagnosis</b>                          |                    |    |                                    |      |                           |      | <b>&lt;.001</b> |
| Anxiety disorder                          | 1397               | 4  | 327                                | 23.4 | 1070                      | 76.6 |                 |
| Bipolar disorder                          | 5786               | 18 | 1240                               | 21.4 | 4546                      | 78.6 |                 |
| Major depressive disorder                 | 8992               | 29 | 1983                               | 22.1 | 7009                      | 77.9 |                 |
| Other                                     | 1897               | 6  | 365                                | 19.2 | 1532                      | 80.8 |                 |
| Schizophrenia spectrum                    | 13236              | 42 | 2417                               | 18.3 | 10819                     | 81.7 |                 |
| <b>Drug/alcohol use history</b>           |                    |    |                                    |      |                           |      | .606            |
| Yes                                       | 4760               | 15 | 975                                | 20.5 | 3785                      | 79.5 |                 |
| No                                        | 26548              | 85 | 5357                               | 20.2 | 21191                     | 79.8 |                 |
| <b>Evidence of healthcare utilization</b> |                    |    |                                    |      |                           |      | <b>&lt;.001</b> |
| Yes                                       | 23033              | 74 | 5660                               | 24.6 | 17373                     | 75.4 |                 |
| No                                        | 8275               | 26 | 672                                | 8.1  | 7603                      | 91.9 |                 |

<sup>a</sup> Defined by evidence of cervical cancer screening in the past year.

<sup>b</sup> These age categories were those provided by the California Department of Health Care Services to the study investigators
